# Supplementary material for: A Comparison of Shear Wave Elastography between Normal Myometrium, Uterine Fibroids, and Adenomyosis: A Cross-Sectional Study
Source: PubMed Central journal article supplement — Int J Fertil Steril. 2022 Jan 17;16(1):49–54. doi: 10.22074/IJFS.2021.523075.1074 (PMC8808257; doi:10.22074/ijfs.2021.523075.1074), 2022-01-17
Supplement: Int-J-Fertil-Steril-16-49-s01.pdf [file Int-J-Fertil-Steril-16-49-s01.pdf]

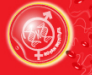

# A Comparison of Shear Wave Elastography between Normal Myometrium, Uterine Fibroids, and Adenomyosis: A Cross-Sectional Study

Sutee Pongpunprut, M.D.<sup>1</sup>, Panyu Panburana, M.D.<sup>2</sup>, Pornphan Wibulpolprasert, M.D.<sup>3</sup>, Wanwisa Waiyaput, M.Sc.<sup>4</sup>, Morakot Sroyraya, Ph.D.<sup>5</sup>, Tharintorn Chanson, M.D.<sup>6</sup>, Areepan Sophonsritsuk, M.D., Ph.D.<sup>7\*</sup>

1. Department of Obstetrics and Gynaecology, Panyanantaphikkhu Chonprathan Medical Centre, Srinakharinwirot University, Nontaburi, Thailand
2. Foetal and Maternal Medicine Division, Department of Obstetrics and Gynaecology, Faculty of Medicine Ramathibodi Hospital, Mahidol University, Bangkok, Thailand
3. Division of Diagnostic Radiology, Department of Diagnostic and Therapeutic, Radiology, Faculty of Medicine, Ramathibodi Hospital, Mahidol University, Bangkok, Thailand
4. Office of Research Academic and Innovation, Faculty of Medicine, Ramathibodi Hospital, Mahidol University, Bangkok, Thailand
5. Department of Anatomy, Faculty of Science, Mahidol University, Bangkok, Thailand
6. Department of Pathology, Faculty of Medicine, Ramathibodi Hospital, Mahidol University, Bangkok, Thailand
7. Reproductive Endocrinology and Infertility Division, Department of Obstetrics and Gynaecology, Faculty of Medicine, Ramathidodi Hospital, Mahidol University, Bangkok, Thailand

**Table S1:** Comparison mean shear wave velocity by menopausal status

| Normal myometrium | Premenopause | Postmenopause | P value |
|-------------------|--------------|---------------|---------|
| Control           |              |               |         |
| n (%)             | 4 (16)       | 21 (84)       | 0.390   |
| Mean SWV ± SD     | 3.04 ± 0.92  | 3.49 ± 1.10   |         |
| Adenomyosis       |              |               |         |
| n (%)             | 20 (80)      | 5 (20)        | 0.061   |
| Mean SWV ± SD     | 4.91 ± 1.28  | 3.55 ± 1.76   |         |
| Fibroid           |              |               |         |
| n (%)             | 19 (76)      | 6 (24)        | 0.843   |
| Mean SWV ± SD     | 4.58 ± 0.96  | 4.47 ± 1.53   |         |

The Student's t test was used to compare mean SWV between two groups. n; Sample number and SWV; Shear wave velocity.

Received: 14/January/2021, Accepted: 17/July/2021

\*Corresponding Address: Reproductive Endocrinology and Infertility Division, Department of Obstetrics and Gynaecology, Faculty of Medicine, Ramathibodi Hospital, Mahidol University, Bangkok, Thailand  
Email: areepan.sop@mahidol.ac.th
